# Supplementary material
Source: MDPI journal article supplement (https://www.mdpi.com/2673-6179/2/2/5)
Supplement: s1 [file s1]

# Effects of *Bifidobacterium animalis* subsp. *lactis* BI-04 on Skin Wrinkles and Dryness: A Randomized, Triple-Blinded, Placebo-Controlled Clinical Trial

Laura Huuskonen, Anna Lyra, Eunju Lee, Jahyun Ryu, Hyunjin Jeong, Jihwoon Baek, Youngkyoung Seo, Minkyung Shin, Kirsti Tiitonen, Tommi Pesonen, Antti Lauerma, Jenni Reimari, Alvin Ibarra and Heli Anglenius

## Supplementary Tables:

**Supplementary Table S1:** Participants' self-evaluated lifestyle and skin characteristics in *Bifidobacterium animalis* subsp. *lactis* BI-04 (BI-04) and placebo groups in the per-protocol (PP) population.

**Supplementary Table S2:** Transepidermal water loss (TEWL) from the skin in the PP population.

**Supplementary Table S3:** Skin elasticity according to the R2 parameter (E/mm) in the PP population.

**Supplementary Table S4:** Skin gloss values as skin gloss units (SGUs), measured from the cheek in the PP population.

**Supplementary Table S5:** Subjective evaluation of investigational product efficacy and usability in the PP population.

**Supplementary Table S6:** Body composition of the participants in the PP population.

**Supplementary Table S7:** Blood safety test values of the participants in the safety population.

**Supplementary Table S8:** Descriptive statistics of 7-day average daily mean temperature (°C), minimum temperature (°C), maximum temperature (°C), and mean relative humidity (%) by treatment and visit for the PP population.

**Supplementary Table S9:** Descriptive statistics of 7-day mode of ultraviolet (UV) index and 7-day maximum UV index for the PP population.

**Supplementary Table S10:** Analysis of 7-day average daily mean temperature (°C), minimum temperature (°C), maximum temperature (°C), mean relative humidity (%), and maximum UV index for the PP population between time points and groups.

**Supplementary Figure S1:** Three-dimensional (3D) image of the corner of the eye area of a participant in the BI-04 group.

**Table S1.** Participants' self-evaluated lifestyle and skin characteristics in *Bifidobacterium animalis* subsp. *lactis* BI-04 (BI-04) and placebo groups in the per-protocol (PP) population.

| Item                                                                 | Classification       | BI-04<br>(N = 61)<br>N (%) <sup>1</sup> | Placebo<br>(N = 67)<br>N (%) <sup>1</sup> | Total<br>(N = 128)<br>N (%) <sup>1</sup> |
|----------------------------------------------------------------------|----------------------|-----------------------------------------|-------------------------------------------|------------------------------------------|
| Average daily sleep                                                  | Fewer than 5 h       | 2 (3.3)                                 | 2 (3.0)                                   | 4 (3.1)                                  |
|                                                                      | 5–8 h                | 51 (83.6)                               | 58 (86.6)                                 | 109 (85.2)                               |
|                                                                      | More than 8 h        | 8 (13.1)                                | 7 (10.4)                                  | 15 (11.7)                                |
| Average daily smoking                                                | No                   | 61 (100.0)                              | 66 (98.5)                                 | 127 (99.2)                               |
|                                                                      | Fewer than 10 pieces | 0 (0.0)                                 | 1 (1.5)                                   | 1 (0.8)                                  |
|                                                                      | More than 10 pieces  | 0 (0.00)                                | 0 (0.00)                                  | 0 (0.00)                                 |
| Sensitivity of skin                                                  | Yes                  | 7 (11.5)                                | 5 (7.5)                                   | 12 (9.4)                                 |
|                                                                      | No                   | 54 (88.5)                               | 62 (92.5)                                 | 116 (90.6)                               |
| Tendency to feel stinging within 30 minutes after applying cosmetics | Yes                  | 1 (1.6)                                 | 2 (3.0)                                   | 3 (2.3)                                  |
|                                                                      | No                   | 60 (98.4)                               | 65 (97.0)                                 | 125 (97.7)                               |
| Adverse reaction to cosmetics in the last 12 months                  | Yes                  | 0 (0.00)                                | 0 (0.00)                                  | 0 (0.00)                                 |
|                                                                      | No                   | 61 (100.0)                              | 67 (100.0)                                | 128 (100.0)                              |

<sup>1</sup> N (Frequency) = Number of answers, % (Percentage) = Number of answers/Total number of subjects (61 or 67) × 100.

**Table S2.** Transepidermal water loss (TEWL) from the skin in the PP population. TEWL was measured from three areas (cheek, forearm, and hand) every 4 weeks from baseline to Week 12.

| Location                   | Time point | BI-04 (N = 61)         |                              | Placebo (N = 67)       |                              | <i>p</i> -Value <sup>2</sup> |
|----------------------------|------------|------------------------|------------------------------|------------------------|------------------------------|------------------------------|
|                            |            | Mean (SD) <sup>5</sup> | <i>p</i> -Value <sup>1</sup> | Mean (SD) <sup>5</sup> | <i>p</i> -Value <sup>1</sup> |                              |
| Cheek, g/hm <sup>2</sup>   | Baseline   | 15.39 (4.48)           | -                            | 15.80 (3.79)           | -                            | 0.569                        |
|                            | 4 weeks    | 15.21 (4.26)           | 0.652                        | 15.40 (3.58)           | 0.377                        | 0.710                        |
|                            | 8 weeks    | 14.49 (3.98)           | 0.047*                       | 14.23 (3.23)           | 0.002*                       | 0.308                        |
|                            | 12 weeks   | 13.85 (3.42)           | <0.001*                      | 13.88 (3.48)           | <0.001*                      | 0.525                        |
| Forearm, g/hm <sup>2</sup> | Baseline   | 7.51 (2.34)            | -                            | 6.93 (1.86)            | -                            | 0.275 <sup>4</sup>           |
|                            | 4 weeks    | 6.27 (1.63)            | <0.001* <sup>3</sup>         | 6.43 (2.14)            | 0.030*                       | 0.920 <sup>4</sup>           |
|                            | 8 weeks    | 6.12 (1.55)            | <0.001* <sup>3</sup>         | 6.20 (2.28)            | 0.007*                       | 0.728 <sup>4</sup>           |
|                            | 12 weeks   | 6.08 (1.42)            | <0.001* <sup>3</sup>         | 5.85 (1.13)            | <0.001*                      | 0.532 <sup>4</sup>           |
| Hand, g/hm <sup>2</sup>    | Baseline   | 13.10 (3.36)           | -                            | 12.94 (2.67)           | -                            | 0.769                        |
|                            | 4 weeks    | 12.10 (3.26)           | 0.005*                       | 11.57 (2.70)           | <0.001*                      | 0.428                        |
|                            | 8 weeks    | 11.42 (2.71)           | <0.001*                      | 10.96 (2.84)           | <0.001*                      | 0.521                        |
|                            | 12 weeks   | 10.54 (2.29)           | <0.001*                      | 10.39 (2.07)           | <0.001*                      | 0.987                        |

<sup>1</sup> Within-group comparisons to baseline by Repeated measures analysis of variance (RM-ANOVA). Significant *p*-values (*p* < 0.05) are marked with an asterisk (\*). <sup>2</sup> Between-group comparisons at baseline by independent t-test and at Weeks 4, 8, and 12 by RM-ANOVA. Significant *p*-values (*p* < 0.05) are marked with an asterisk (\*). <sup>3</sup> Wilcoxon Signed-rank test with Bonferroni correction was applied when values were not normally distributed. <sup>4</sup> Mann-Whitney U-test was applied when values were not normally distributed. <sup>5</sup> Values represented as mean ± standard deviation (SD).

**Table S3.** Skin elasticity according to the R2 parameter (E/mm) in the PP population. Skin elasticity was measured from the cheek every 4 weeks from baseline to Week 12.

| Time point | BI-04 (N = 61)  |                              | Placebo (N = 67) |                              | <i>p</i> -Value <sup>2</sup> |
|------------|-----------------|------------------------------|------------------|------------------------------|------------------------------|
|            | Mean (SD)       | <i>p</i> -Value <sup>1</sup> | Mean (SD)        | <i>p</i> -Value <sup>1</sup> |                              |
| Baseline   | 0.6679 (0.0359) | -                            | 0.6734 (0.0410)  | -                            | 0.420                        |
| 4 weeks    | 0.6810 (0.0337) | <0.001*                      | 0.6809 (0.0365)  | 0.028*                       | 0.249                        |
| 8 weeks    | 0.6727 (0.0372) | 0.147                        | 0.6812 (0.0365)  | 0.008*                       | 0.490                        |
| 12 weeks   | 0.6766 (0.0356) | 0.007*                       | 0.6793 (0.0373)  | 0.067                        | 0.536                        |

<sup>1</sup> Within-group comparisons to baseline by RM-ANOVA. Significant *p*-values (*p* < 0.05) are marked with an asterisk (\*). <sup>2</sup> Between-group comparisons at baseline by independent t-test and at Weeks 4, 8, and 12 by RM-ANOVA. Significant *p*-values (*p* < 0.05) are marked with an asterisk (\*).

**Table S4.** Skin gloss values in skin gloss units (SGUs), measured from the cheek in the PP population. Skin gloss was measured from the cheek every 4 weeks from baseline to Week 12.

| Time point | BI-04 (N = 61) |                              | Placebo (N = 67) |                              | <i>p</i> -Value <sup>2</sup> |
|------------|----------------|------------------------------|------------------|------------------------------|------------------------------|
|            | Mean (SD)      | <i>p</i> -Value <sup>1</sup> | Mean (SD)        | <i>p</i> -Value <sup>1</sup> |                              |
| Baseline   | 63.77 (6.74)   | -                            | 64.34 (6.52)     | -                            | 0.629                        |
| 4 weeks    | 62.70 (5.72)   | 0.053                        | 63.41 (5.91)     | 0.036*                       | 0.835                        |
| 8 weeks    | 62.96 (5.33)   | 0.165                        | 63.68 (5.52)     | 0.162                        | 0.843                        |
| 12 weeks   | 63.09 (5.54)   | 0.188                        | 63.65 (5.19)     | 0.158                        | 0.994                        |

<sup>1</sup> Within-group comparisons to baseline by RM-ANOVA. Significant *p*-values (*p* < 0.05) are marked with an asterisk (\*). <sup>2</sup> Between-group comparisons at baseline by independent t-test and at Weeks 4, 8, and 12 by RM-ANOVA. Significant *p*-values (*p* < 0.05) are marked with an asterisk (\*).

**Table S5.** Subjective evaluation of investigational product efficacy and usability in the PP population. Subjective efficacy assessment was performed at Weeks 4, 8, and 12, and usability was assessed at Week 12.

| Parameter                                                                                              | Time point | BI-04 (N = 61)<br>N (%) <sup>1</sup> | Placebo (N = 67)<br>N (%) <sup>1</sup> | p-Value <sup>2</sup> |
|--------------------------------------------------------------------------------------------------------|------------|--------------------------------------|----------------------------------------|----------------------|
| <b>Efficacy Assessment</b>                                                                             |            |                                      |                                        |                      |
| Q1. I feel like my skin became more hydrated/moistened after intake of the test product.               | 4 weeks    | 34 (55.74)                           | 33 (49.25)                             | 0.195                |
|                                                                                                        | 8 weeks    | 38 (62.30)                           | 49 (73.13)                             | 0.302                |
|                                                                                                        | 12 weeks   | 40 (65.57)                           | 44 (65.67)                             | 0.101                |
| Q2. I feel like my skin became brighter after intake of the test product.                              | 4 weeks    | 27 (44.26)                           | 23 (34.33)                             | 0.288                |
|                                                                                                        | 8 weeks    | 32 (52.46)                           | 38 (56.72)                             | 0.719                |
|                                                                                                        | 12 weeks   | 37 (60.66)                           | 36 (53.73)                             | 0.940                |
| Q3. I feel like my skin became firmer after intake of the test product.                                | 4 weeks    | 15 (24.59)                           | 19 (28.36)                             | 0.975                |
|                                                                                                        | 8 weeks    | 26 (42.62)                           | 27 (40.30)                             | 0.811                |
|                                                                                                        | 12 weeks   | 23 (37.70)                           | 31 (46.27)                             | 0.438                |
| Q4. I feel like the skin wrinkles at the corner of the eye decreased after intake of the test product. | 4 weeks    | 13 (21.31)                           | 14 (20.90)                             | 1.000                |
|                                                                                                        | 8 weeks    | 15 (24.59)                           | 21 (31.34)                             | 0.449                |
|                                                                                                        | 12 weeks   | 24 (39.34)                           | 26 (38.81)                             | 0.632                |
| Q5. I feel like my skin dryness decreased after intake of the test product.                            | 4 weeks    | 34 (55.74)                           | 34 (50.75)                             | 0.407                |
|                                                                                                        | 8 weeks    | 42 (68.85)                           | 51 (76.12)                             | 0.288                |
|                                                                                                        | 12 weeks   | 40 (65.57)                           | 51 (76.12)                             | 0.473                |
| Q6. I feel like my overall skin condition and appearance improved after intake of the test product.    | 4 weeks    | 26 (42.62)                           | 32 (47.76)                             | 0.856                |
|                                                                                                        | 8 weeks    | 41 (67.21)                           | 47 (70.15)                             | 0.813                |
|                                                                                                        | 12 weeks   | 37 (60.66)                           | 46 (68.66)                             | 0.805                |
| Q7. I feel like my skin gloss increased after intake of the test product.                              | 4 weeks    | 23 (37.70)                           | 26 (38.81)                             | 1.000                |
|                                                                                                        | 8 weeks    | 28 (45.90)                           | 38 (56.72)                             | 0.569                |
|                                                                                                        | 12 weeks   | 31 (50.82)                           | 31 (46.27)                             | 0.208                |
| Q8. I feel like my fine lines and wrinkles decreased after intake of the test product.                 | 4 weeks    | 16 (26.23)                           | 15 (22.39)                             | 0.778                |
|                                                                                                        | 8 weeks    | 17 (27.87)                           | 21 (31.34)                             | 0.350                |
|                                                                                                        | 12 weeks   | 22 (36.07)                           | 22 (32.84)                             | 0.260                |
| <b>Usability Assessment</b>                                                                            |            |                                      |                                        |                      |
| Q1. Was it easy to take the test product?                                                              | 12 weeks   | 55 (90.16)                           | 64 (95.52)                             | 0.525                |
| Q2. What was your satisfaction in using the test product?                                              | 12 weeks   | 46 (75.41)                           | 58 (86.57)                             | 0.229                |
| Q3. Would you like to purchase the test product?                                                       | 12 weeks   | 44 (72.13)                           | 50 (74.63)                             | 0.774                |
| Q4. Would you recommend this product to others?                                                        | 12 weeks   | 43 (70.49)                           | 46 (68.66)                             | 0.411                |

<sup>1</sup> N (Frequency) = Number of positive answers (4. Somewhat agree/satisfied/easy or 5. Agree/satisfied/easy), % (Percentage) = Number of positive answers / Total number of subjects × 100. Answers "1. Difficult/Dissatisfied/Disagree," "2. Somewhat difficult/dissatisfied/disagree," and "3. No opinion" not shown in this table. <sup>2</sup>Between-group comparison by chi-square test and Fisher's exact test. Significant *p*-values (*p* < 0.05) are marked with an asterisk (\*).

**Table S6.** Body composition of the participants in the PP population. The body composition was measured at baseline and at Week 12.

| Parameter         | Time point           | BI-04<br>(N = 61)<br>Mean (SD) | p-Value <sup>1</sup> | Placebo<br>(N = 67)<br>Mean (SD) | p-Value <sup>1</sup> | Total<br>(N = 128)<br>Mean (SD) | p-Value <sup>3</sup> |
|-------------------|----------------------|--------------------------------|----------------------|----------------------------------|----------------------|---------------------------------|----------------------|
| Body fat mass, kg | Baseline             | 20.21 (6.796)                  |                      | 18.73 (5.178)                    |                      | 19.44 (6.026)                   | 0.169                |
|                   | 12 weeks             | 19.60 (6.973)                  |                      | 18.39 (5.255)                    |                      | 18.97 (6.139)                   | 0.275                |
|                   | Change from baseline | -0.61 (1.258)                  | <0.001*              | -0.33 (1.411)                    | 0.009* <sup>2</sup>  | -0.47 (1.343)                   |                      |

|                                    |                      |                 |         |                 |                      |                 |        |
|------------------------------------|----------------------|-----------------|---------|-----------------|----------------------|-----------------|--------|
| Body mass index, kg/m <sup>2</sup> | Baseline             | 23.67 (3.721)   |         | 22.86 (2.767)   |                      | 23.24 (3.269)   | 0.166  |
|                                    | 12 weeks             | 23.36 (3.808)   |         | 22.63 (2.810)   |                      | 22.98 (3.330)   | 0.220  |
|                                    | Change from baseline | -0.31 (0.505)   | <0.001* | -0.23 (0.552)   | 0.001*               | -0.27 (0.529)   |        |
| Percent body fat, %                | Baseline             | 32.52 (5.555)   |         | 32.00 (5.382)   |                      | 32.25 (5.450)   | 0.590  |
|                                    | 12 weeks             | 31.89 (5.994)   |         | 31.71 (5.200)   |                      | 31.80 (5.571)   | 0.856  |
|                                    | Change from baseline | -0.63 (1.902)   | 0.012*  | -0.29 (1.730)   | 0.180                | -0.45 (1.815)   |        |
| Waist-hip ratio, AU                | Baseline             | 0.862 (0.0477)  |         | 0.853 (0.0456)  |                      | 0.857 (0.0467)  | 0.271  |
|                                    | 12 weeks             | 0.851 (0.0480)  |         | 0.845 (0.0412)  |                      | 0.848 (0.0445)  | 0.469  |
|                                    | Change from baseline | -0.011 (0.0197) | <0.001* | -0.008 (0.0202) | <0.001* <sup>2</sup> | -0.010 (0.0200) |        |
| Weight, kg                         | Baseline             | 60.98 (9.793)   |         | 57.69 (8.346)   |                      | 59.26 (9.178)   | 0.042* |
|                                    | 12 weeks             | 60.18 (9.974)   |         | 57.11 (8.479)   |                      | 58.57 (9.313)   | 0.062  |
|                                    | Change from baseline | -0.81 (1.316)   | <0.001* | -0.58 (1.440)   | 0.002*               | -0.69 (1.381)   |        |

<sup>1</sup> Within-group comparisons to baseline by paired t-test. Significant *p*-values (*p* < 0.05) are marked with an asterisk (\*). <sup>2</sup> Wilcoxon Signed-rank test was applied when values were not normally distributed. <sup>3</sup> Between-group comparisons by t-test. Significant *p*-values (*p* < 0.05) are marked with an asterisk (\*).

**Table S7.** Blood safety test values of the participants in the safety population. Blood test values were measured at the screening visit and at Week 12.

| Parameter              | Time point | BI-04 (N = 74) |                              | Placebo (N = 73) |                              |
|------------------------|------------|----------------|------------------------------|------------------|------------------------------|
|                        |            | Mean (SD)      | <i>p</i> -Value <sup>1</sup> | Mean (SD)        | <i>p</i> -Value <sup>1</sup> |
| Glucose, mg/dL         | Screening  | 97.15 (11.84)  |                              | 96.40 (9.54)     |                              |
|                        | 12 weeks   | 101.85 (14.03) | <0.001* <sup>2</sup>         | 102.15 (12.20)   | <0.001* <sup>2</sup>         |
| Hemoglobin, g/dL       | Screening  | 13.18 (1.06)   |                              | 13.28 (0.93)     |                              |
|                        | 12 weeks   | 13.19 (1.14)   | 0.951                        | 13.28 (1.00)     | 0.944                        |
| GPT, U/L               | Screening  | 18.50 (7.81)   |                              | 22.03 (18.87)    |                              |
|                        | 12 weeks   | 18.26 (9.39)   | 0.107 <sup>2</sup>           | 19.15 (12.22)    | 0.012* <sup>2</sup>          |
| GOT, U/L               | Screening  | 23.14 (4.91)   |                              | 27.12 (20.42)    |                              |
|                        | 12 weeks   | 22.41 (5.66)   | 0.045*                       | 23.15 (8.77)     | <0.001* <sup>2</sup>         |
| γ-GTP, U/L             | Screening  | 21.88 (43.29)  |                              | 19.33 (15.70)    |                              |
|                        | 12 weeks   | 21.26 (43.30)  | 0.013* <sup>2</sup>          | 16.42 (11.61)    | <0.001* <sup>2</sup>         |
| Cholesterol, mg/dL     | Screening  | 199.64 (33.84) |                              | 203.36 (34.24)   |                              |
|                        | 12 weeks   | 214.05 (35.08) | <0.001*                      | 218.12 (36.65)   | <0.001*                      |
| Triglyceride, mg/dL    | Screening  | 101.62 (54.24) |                              | 103.99 (56.27)   |                              |
|                        | 12 weeks   | 113.24 (72.13) | 0.115 <sup>2</sup>           | 112.78 (62.29)   | 0.258 <sup>2</sup>           |
| LDL-Cholesterol, mg/dL | Screening  | 123.78 (26.57) |                              | 129.01 (26.75)   |                              |
|                        | 12 weeks   | 127.15 (26.96) | 0.094                        | 130.93 (26.91)   | 0.313                        |
| HDL-Cholesterol, mg/dL | Screening  | 68.46 (13.24)  |                              | 67.95 (13.23)    |                              |
|                        | 12 weeks   | 64.27 (13.36)  | <0.001*                      | 63.75 (11.59)    | <0.001*                      |
| Creatinine, mg/dL      | Screening  | 0.79 (0.08)    |                              | 0.79 (0.10)      |                              |
|                        | 12 weeks   | 0.82 (0.08)    | <0.001*                      | 0.82 (0.10)      | <0.001*                      |

<sup>1</sup> Comparisons to baseline by paired t-test. Significant *p*-values (*p* < 0.05) are marked with an asterisk (\*). <sup>2</sup> Wilcoxon Signed-rank test with Bonferroni correction was applied when values were not normally distributed.

**Table S8.** Descriptive statistics of 7-day average daily mean temperature (°C), minimum temperature (°C), maximum temperature (°C), and mean relative humidity (%) by treatment and visit for the PP population.

| Parameter                 | Time point | BI-04 (N = 61) | Placebo (N = 67) | Total (N = 128) |
|---------------------------|------------|----------------|------------------|-----------------|
|                           |            | Mean (SD)      | Mean (SD)        | Mean (SD)       |
| Mean temperature, °C      | Baseline   | -0.82 (4.234)  | -1.18 (4.315)    | -1.01 (4.264)   |
| Minimum temperature, °C   |            | -5.08 (4.381)  | -5.47 (4.430)    | -5.29 (4.394)   |
| Maximum temperature, °C   |            | 3.47 (4.048)   | 3.17 (4.164)     | 3.31 (4.096)    |
| Mean relative humidity, % |            | 59.46 (6.358)  | 58.86 (6.291)    | 59.15 (6.305)   |
| Mean temperature, °C      | 4 weeks    | 0.44 (3.070)   | 0.40 (2.969)     | 0.42 (3.005)    |
| Minimum temperature, °C   |            | -4.42 (2.805)  | -4.47 (2.830)    | -4.45 (2.807)   |
| Maximum temperature, °C   |            | 5.72 (3.355)   | 5.72 (3.249)     | 5.72 (3.287)    |
| Mean relative humidity, % |            | 53.50 (6.963)  | 54.33 (7.473)    | 53.94 (7.218)   |
| Mean temperature, °C      | 8 weeks    | 9.85 (1.769)   | 9.66 (1.776)     | 9.75 (1.768)    |
| Minimum temperature, °C   |            | 4.50 (1.511)   | 4.33 (1.525)     | 4.41 (1.515)    |
| Maximum temperature, °C   |            | 16.13 (1.916)  | 15.96 (1.920)    | 16.04 (1.912)   |
| Mean relative humidity, % |            | 57.50 (4.893)  | 58.01 (4.962)    | 57.77 (4.916)   |
| Mean temperature, °C      | 12 weeks   | 14.10 (2.184)  | 14.16 (2.498)    | 14.13 (2.344)   |
| Minimum temperature, °C   |            | 8.95 (2.405)   | 9.05 (2.646)     | 9.00 (2.524)    |
| Maximum temperature, °C   |            | 19.79 (2.556)  | 19.75 (2.882)    | 19.77 (2.721)   |
| Mean relative humidity, % |            | 52.71 (7.264)  | 52.09 (7.715)    | 52.38 (7.480)   |

**Table S9.** Descriptive statistics of 7-day mode of ultraviolet (UV) index and 7-day maximum UV index for the PP population.

| Parameter              | Time point | Value    | BI-04 (N = 61) | Placebo (N = 67) | Total (N = 128) |
|------------------------|------------|----------|----------------|------------------|-----------------|
|                        |            |          | N (%)          | N (%)            | N (%)           |
| 7-day mode of UV index | Baseline   | Low      | 42 (68.9)      | 40 (59.7)        | 82 (64.1)       |
|                        |            | Moderate | 19 (31.1)      | 27 (40.3)        | 46 (35.9)       |
|                        | 4 weeks    | Low      | 7 (11.5)       | 10 (14.9)        | 17 (13.3)       |
|                        |            | Moderate | 54 (88.5)      | 57 (85.1)        | 111 (86.7)      |
|                        | 8 weeks    | Moderate | 48 (78.7)      | 53 (79.1)        | 101 (78.9)      |
|                        |            | High     | 13 (21.3)      | 14 (20.9)        | 27 (21.1)       |
| 7-day maximum UV index | 12 weeks   | Moderate | 8 (13.1)       | 15 (22.4)        | 23 (18.0)       |
|                        |            | High     | 53 (86.9)      | 52 (77.6)        | 105 (82.0)      |
|                        | Baseline   | Moderate | 52 (85.2)      | 56 (83.6)        | 108 (84.4)      |
|                        |            | Extreme  | 9 (14.8)       | 11 (16.4)        | 20 (15.6)       |
|                        | 4 weeks    | Moderate | 61 (100.0)     | 67 (100.0)       | 128 (100.0)     |
|                        | 8 weeks    | Moderate | 32 (52.5)      | 40 (59.7)        | 72 (56.3)       |
|                        |            | High     | 29 (47.5)      | 27 (40.3)        | 56 (43.8)       |
|                        | 12 weeks   | High     | 61 (100.0)     | 67 (100.0)       | 128 (100.0)     |

**Table S10.** Analysis of 7-day average daily mean temperature (°C), minimum temperature (°C), maximum temperature (°C), mean relative humidity (%), and maximum UV index for the PP population between time points and groups.

| Comparison, p-values <sup>1</sup>    | 7-day temperature |         |         | 7-day average daily mean relative humidity | 7-day maximum UV index |
|--------------------------------------|-------------------|---------|---------|--------------------------------------------|------------------------|
|                                      | Mean              | Minimum | Maximum |                                            |                        |
| BI-04 at 4 weeks <i>vs</i> baseline  | 0.050*            | 0.307   | 0.002*  | <0.001*                                    | 0.004*                 |
| BI-04 at 8 weeks <i>vs</i> baseline  | <0.001*           | <0.001* | <0.001* | 0.114                                      | 0.328                  |
| BI-04 at 8 weeks <i>vs</i> 4 weeks   | <0.001*           | <0.001* | <0.001* | <0.001*                                    | <0.001*                |
| BI-04 at 12 weeks <i>vs</i> baseline | <0.001*           | <0.001* | <0.001* | <0.001*                                    | <0.001*                |

|                                        |         |         |         |         |         |
|----------------------------------------|---------|---------|---------|---------|---------|
| BI-04 at 12 weeks <i>vs</i> 8 weeks    | <0.001* | <0.001* | <0.001* | 0.003*  | <0.001* |
| Placebo at 4 weeks <i>vs</i> baseline  | 0.002*  | 0.110   | <0.001* | 0.002*  | 0.001*  |
| Placebo at 8 weeks <i>vs</i> baseline  | <0.001* | <0.001* | <0.001* | 0.492   | 0.911   |
| Placebo at 8 weeks <i>vs</i> 4 weeks   | <0.001* | <0.001* | <0.001* | 0.004*  | <0.001* |
| Placebo at 12 weeks <i>vs</i> baseline | <0.001* | <0.001* | <0.001* | <0.001* | <0.001* |
| Placebo at 12 weeks <i>vs</i> 8 weeks  | <0.001* | <0.001* | <0.001* | <0.001* | <0.001* |
| Overall BI-04 <i>vs</i> Placebo        | 0.670   | 0.582   | 0.770   | 0.845   | 0.610   |
| BI-04 <i>vs</i> Placebo at baseline    | 0.704   | 0.648   | 0.804   | 0.598   | 0.799   |
| BI-04 <i>vs</i> Placebo at 4 weeks     | 0.950   | 0.962   | 0.943   | 0.364   | 1.000   |
| BI-04 <i>vs</i> Placebo at 8 weeks     | 0.609   | 0.616   | 0.672   | 0.604   | 0.413   |
| BI-04 <i>vs</i> Placebo at 12 weeks    | 0.916   | 0.932   | 0.981   | 0.609   | 1.000   |

<sup>1</sup> Comparisons were made by Wilcoxon Signed-rank test or Mann-Whitney U-test. Significant *p*-values (*p* < 0.05) are marked with an asterisk (\*).

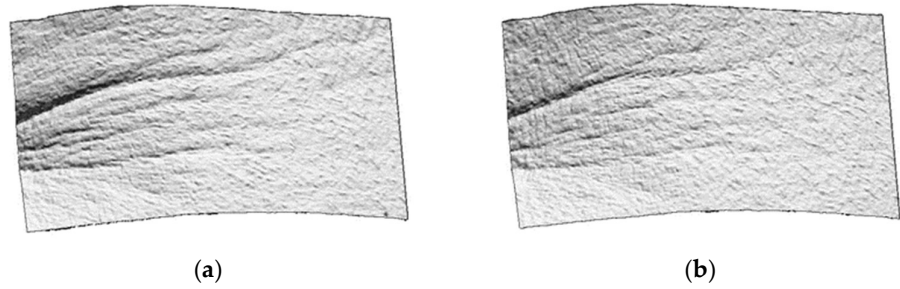

**Figure S1.** Three-dimensional (3D) image of the corner of the eye area of a participant in the BI-04 group. Corner of the eye area of Participant DEF-20107-077 at (a) baseline and (b) Week 4, taken with the PRIMOS® premium imaging system.
